# Supplementary material for: Agreement between continuous and intermittent pulmonary artery thermodilution for cardiac output measurement in perioperative and intensive care medicine: a systematic review and meta-analysis
Source: Springer Nature journal article supplement (doi:10.1186/s13054-021-03523-7), 2021-03-29
Supplement: MOESM3 [file 19016686]

### Additional file 3: Summary of the included studies and cardiac output measurement data

| First author | Year | Journal                           | Setting | Patient population                                | Patients (n) | MD (SD) (L/min) | Lower 95%-LOA (L/min) | Upper 95%-LOA (L/min) | PE (%) |
|--------------|------|-----------------------------------|---------|---------------------------------------------------|--------------|-----------------|-----------------------|-----------------------|--------|
| Yelderman    | 1992 | <i>J Cardiothorac Vasc Anesth</i> | ICU     | critically ill                                    | 54           | -0.02 (0.54)    | -1.07                 | 1.03                  | na     |
| Boldt        | 1994 | <i>Crit Care Med</i>              | ICU     | critically ill                                    | 35           | -0.03 (0.52)    | -1.07                 | 1.01                  | na     |
| Hogue        | 1994 | <i>J Cardiothorac Vasc Anesth</i> | OR      | cardiac surgery                                   | 25           | 0.41 (0.82)     | -1.23                 | 2.05                  | 37.6   |
| Böttiger     | 1995 | <i>J Cardiothorac Vasc Anesth</i> | OR/ICU  | cardiac surgery                                   | 30           | -0.02 (0.59)    | -1.18                 | 1.14                  | na     |
| Ditmyer      | 1995 | <i>Am J Crit Care</i>             | ICU     | cardiac surgery                                   | 14           | 0.10 (0.64)     | -1.18                 | 1.34                  | na     |
| Haller       | 1995 | <i>Crit Care Med</i>              | ICU     | critically ill                                    | 12           | 0.35 (1.01)     | -1.67                 | 2.37                  | na     |
| Jakobsen     | 1995 | <i>Acta Anaesthesiol Scand</i>    | OR/ICU  | cardiac or aortic aneurysm surgery                | 20           | 0.31 (0.87)     | -1.40                 | 2.00                  | na     |
| Lefrant      | 1995 | <i>Can J Anaesth</i>              | ICU     | critically ill                                    | 19           | 0.80 (1.20)     | -1.60                 | 3.20                  | na     |
| Böttiger     | 1996 | <i>Intensive Care Med</i>         | ICU     | cardiac surgery                                   | 22           | 0.05 (0.56)     | -1.05                 | 1.15                  | na     |
| Jacquet      | 1996 | <i>Intensive Care Med</i>         | ICU     | cardiac surgery or critically ill (septic shock)  | 23           | -0.01 (0.69)    | -1.39                 | 1.37                  | 22.3   |
| Le Tulzo     | 1996 | <i>J Clin Monit</i>               | ICU     | critically ill                                    | 21           | 0.39 (0.85)     | -1.28                 | 2.06                  | 21.7   |
| Böttiger (A) | 1997 | <i>Anaesthesia</i>                | OR      | liver transplantation (different time points)     | 12           | 0.24 (1.79)     | -3.34                 | 3.82                  | na     |
| Böttiger (B) | 1997 | <i>Anaesthesia</i>                | OR      | liver transplantation (different time points)     | 12           | -0.79 (4.31)    | -9.41                 | 7.84                  | na     |
| Boyle        | 1997 | <i>Aust Crit Care</i>             | ICU     | critically ill                                    | 38           | 0.07 (0.85)     | -1.63                 | 1.77                  | na     |
| Burchell     | 1997 | <i>Crit Care Med</i>              | ICU     | critically ill                                    | 21           | -0.49 (1.01)    | -2.51                 | 1.53                  | na     |
| Greim (A)    | 1997 | <i>Anesth Analg</i>               | OR      | liver transplantation (infusion rate ≤ 1000 mL/h) | 14           | 0.20 (0.90)     | -1.60                 | 2.00                  | na     |
| Greim (B)    | 1997 | <i>Anesth Analg</i>               | OR      | liver transplantation (infusion rate > 1000 mL/h) | 14           | 1.00 (1.80)     | -2.60                 | 4.60                  | na     |
| Lazor        | 1997 | <i>J Cardiothorac Vasc Anesth</i> | OR/ICU  | cardiac surgery or liver transplantation          | 29           | -0.06 (0.49)    | -1.04                 | 0.92                  | na     |
| Mihm         | 1998 | <i>Crit Care Med</i>              | ICU     | critically ill                                    | 47           | -0.12 (0.84)    | -1.80                 | 1.56                  | na     |
| Monchi       | 1998 | <i>J Crit Care</i>                | ICU     | critically ill (cardiogenic or septic shock)      | 19           | -0.12 (0.92)    | -1.90                 | 1.70                  | na     |
| Rödig        | 1998 | <i>Eur J Anaesthesiol</i>         | OR      | cardiac surgery                                   | 24           | 0.13 (0.52)     | -0.90                 | 1.16                  | 19.1   |
| Seguin       | 1998 | <i>Can J Anaesth</i>              | ICU     | critically ill                                    | 15           | 0.00 (0.74)     | -1.45                 | 1.45                  | 22.7   |
| Albert       | 1999 | <i>Am J Crit Care</i>             | ICU     | critically ill                                    | 60           | -0.74 (2.20)    | -5.14                 | 3.66                  | 89.3   |
| Cathelyn     | 1999 | <i>J Cardiovasc Nurs</i>          | ICU     | cardiac surgery                                   | 7            | 0.39 (0.37)     | -0.35                 | 1.13                  | na     |
| Neto (A)     | 1999 | <i>Crit Care Med</i>              | ICU     | cardiac surgery (different PACs)                  | 22           | -0.07 (0.53)    | -1.12                 | 0.99                  | na     |

|             |      |                                   |        |                                                                                               |    |              |       |      |      |
|-------------|------|-----------------------------------|--------|-----------------------------------------------------------------------------------------------|----|--------------|-------|------|------|
| Neto (B)    | 1999 | <i>Crit Care Med</i>              | ICU    | cardiac surgery (different PACs)                                                              | 22 | -0.02 (0.49) | -1.00 | 0.97 | na   |
| Rödigg (A)  | 1999 | <i>Br J Anaesth</i>               | OR/ICU | cardiac surgery (ejection fraction > 45%)                                                     | 13 | 0.12 (0.72)  | -1.33 | 1.54 | 24.1 |
| Rödigg (B)  | 1999 | <i>Br J Anaesth</i>               | OR/ICU | cardiac surgery (ejection fraction < 45%)                                                     | 13 | 0.06 (0.76)  | -1.45 | 1.57 | 25.5 |
| Schmid (A)  | 1999 | <i>Intensive Care Med</i>         | ICU    | cardiac or aortic aneurysm surgery (different software versions and fluid bolus temperatures) | 14 | 0.00 (0.90)  | -1.80 | 1.80 | na   |
| Schmid (B)  | 1999 | <i>Intensive Care Med</i>         | ICU    | cardiac or aortic aneurysm surgery (different software versions and fluid bolus temperatures) | 14 | 0.20 (0.80)  | -1.40 | 1.80 | na   |
| Schmid (C)  | 1999 | <i>Intensive Care Med</i>         | ICU    | cardiac or aortic aneurysm surgery (different software versions and fluid bolus temperatures) | 14 | 0.36 (0.84)  | -1.32 | 2.04 | na   |
| Schmid (D)  | 1999 | <i>Intensive Care Med</i>         | ICU    | cardiac or aortic aneurysm surgery (different software versions and fluid bolus temperatures) | 14 | 0.07 (0.70)  | -1.33 | 1.47 | na   |
| Zöllner     | 1999 | <i>Crit Care Med</i>              | ICU    | cardiac surgery                                                                               | 20 | -0.52 (1.29) | -3.10 | 2.06 | na   |
| Sakka       | 2000 | <i>J Cardiothorac Vasc Anesth</i> | ICU    | critically ill (sepsis or septic shock)                                                       | 12 | 0.43 (0.71)  | -0.96 | 1.82 | na   |
| Nelson      | 2001 | <i>Crit Care Med</i>              | ICU    | critically ill (surgical)                                                                     | 28 | -0.11 (0.74) | -1.56 | 1.34 | 18.7 |
| Zöllner (A) | 2001 | <i>Can J Anaesth</i>              | ICU    | cardiac surgery (different PACs)                                                              | 9  | -0.09 (1.04) | -2.17 | 1.99 | 27.2 |
| Zöllner (B) | 2001 | <i>Can J Anaesth</i>              | ICU    | cardiac surgery (different PACs)                                                              | 10 | -0.04 (0.74) | -1.52 | 1.44 | 25.8 |
| Della Rocca | 2002 | <i>Br J Anaesth</i>               | OR     | liver transplantation                                                                         | 62 | 0.02 (0.74)  | -1.46 | 1.50 | 19.0 |
| Rauch       | 2002 | <i>Acta Anaesthesiol Scand</i>    | OR/ICU | cardiac surgery                                                                               | 25 | -0.40 (1.25) | -2.85 | 2.05 | na   |
| Singh       | 2002 | <i>J Cardiothorac Vasc Anesth</i> | OR     | cardiac surgery                                                                               | 20 | -0.10 (0.73) | -1.52 | 1.33 | na   |
| Della Rocca | 2003 | <i>Can J Anaesth</i>              | OR     | lung transplantation                                                                          | 58 | 0.15 (0.70)  | -1.24 | 1.54 | 22.3 |
| Kotake      | 2003 | <i>Anesthesiology</i>             | OR     | aortic aneurysm surgery                                                                       | 28 | 0.38 (1.17)  | -1.91 | 2.67 | 47.2 |
| Mielck      | 2003 | <i>J Cardiothorac Vasc Anesth</i> | ICU    | cardiac surgery                                                                               | 22 | 0.28 (0.94)  | -1.60 | 2.16 | 29.0 |
| Padua       | 2003 | <i>Minerva Anestesiol</i>         | OR/ICU | cardiac surgery                                                                               | 16 | -0.02 (0.11) | -0.24 | 0.20 | 4.8  |
| Thierry     | 2003 | <i>Intensive Care Med</i>         | ICU    | cardiac surgery                                                                               | 8  | 0.07 (0.66)  | -1.25 | 1.39 | na   |
| Ishihara    | 2004 | <i>J Clin Monit Comput</i>        | ICU    | cardiac surgery                                                                               | 36 | -0.64 (0.84) | -2.32 | 1.04 | na   |
| Leather     | 2004 | <i>Anaesthesia</i>                | OR     | cardiac surgery                                                                               | 34 | 0.40 (1.05)  | -1.70 | 2.50 | 56.9 |
| Bendjelid   | 2006 | <i>Intensive Care Med</i>         | ICU    | cardiac surgery                                                                               | 14 | 0.33 (0.60)  | -0.87 | 1.58 | 22.0 |
| Button      | 2007 | <i>Br J Anaesth</i>               | OR/ICU | cardiac surgery                                                                               | 31 | 0.33 (1.19)  | -2.05 | 2.72 | na   |
| Manecke     | 2007 | <i>J Cardiothorac Vasc Anesth</i> | ICU    | cardiac surgery                                                                               | 50 | 0.50 (0.66)  | -0.82 | 1.82 | na   |
| McGee       | 2007 | <i>Crit Care</i>                  | ICU    | critically ill                                                                                | 84 | 0.66 (1.05)  | -1.43 | 2.76 | na   |

|           |      |                                            |        |                                          |    |              |       |      |      |
|-----------|------|--------------------------------------------|--------|------------------------------------------|----|--------------|-------|------|------|
| Bao       | 2008 | <i>Hepatobiliary Pancreat Dis Int</i>      | OR     | liver transplantation                    | 13 | -0.18 (0.97) | -2.09 | 1.73 | 22.0 |
| Costa (A) | 2008 | <i>Intensive Care Med</i>                  | ICU    | liver transplantation (CO < 8 L/min)     | 23 | -0.52 (1.19) | -2.89 | 1.85 | 18.7 |
| Costa (B) | 2008 | <i>Intensive Care Med</i>                  | ICU    | liver transplantation (CO > 8 L/min)     | 23 | 0.44 (1.36)  | -2.27 | 3.15 | 14.5 |
| Kotake    | 2009 | <i>J Clin Monit Comput</i>                 | OR     | aortic aneurysm surgery                  | 42 | 0.19 (0.81)  | -1.43 | 1.81 | 33.4 |
| Cecconi   | 2010 | <i>Minerva Anesthesiol</i>                 | ICU    | critically ill                           | 29 | 0.30 (1.00)  | -1.70 | 2.20 | 28.0 |
| Hamm      | 2010 | <i>Anaesth Intensive Care</i>              | OR/ICU | cardiac surgery                          | 9  | 0.03 (0.42)  | -0.79 | 0.85 | 17.0 |
| Akiyoshi  | 2011 | <i>J Anesth</i>                            | OR     | liver transplantation                    | 20 | 0.79 (1.55)  | -2.25 | 3.83 | 43.0 |
| Cecchini  | 2012 | <i>Annu Int Conf IEEE Eng Med Biol Soc</i> | ICU    | cardiac surgery                          | 15 | 0.27 (0.48)  | -0.68 | 1.21 | 23.9 |
| Costa     | 2014 | <i>J Cardiothorac Vasc Anesth</i>          | ICU    | liver transplantation                    | 20 | -0.68 (1.31) | -3.29 | 1.93 | 29.9 |
| Peyton    | 2014 | <i>Anaesth Intensive Care</i>              | OR     | cardiac surgery or liver transplantation | 30 | 0.10 (1.50)  | -2.84 | 3.04 | 51.3 |
| Cho       | 2016 | <i>J Clin Monit Comput</i>                 | OR     | cardiac surgery                          | 20 | -0.38 (0.57) | -1.50 | 0.74 | 26.7 |
| Ganter    | 2016 | <i>J Clin Monit Comput</i>                 | ICU    | critically ill (septic shock)            | 47 | 0.23 (1.30)  | -2.32 | 2.78 | 40.4 |

A, B, C, or D refer to different subsections of a study that has been treated as two or as four studies in the analysis. CO, cardiac output; ICU, intensive care unit; MD, mean of the differences; n, number of patients; na, not available; OR, operating room; PAC, pulmonary artery catheter; PE, percentage error; SD, standard deviation; 95%-LOA, 95%-limits of agreement.
