# Supplementary material for: Agreement between continuous and intermittent pulmonary artery thermodilution for cardiac output measurement in perioperative and intensive care medicine: a systematic review and meta-analysis
Source: Springer Nature journal article supplement (doi:10.1186/s13054-021-03523-7), 2021-03-29
Supplement: MOESM4 [file 19016686]

Additional file 4: Risk of bias assessment

|                  | Risk of Bias      |            |                    |                 | Applicability concerns |            |                    |
|------------------|-------------------|------------|--------------------|-----------------|------------------------|------------|--------------------|
|                  | Patient Selection | Index Test | Reference Standard | Flow and Timing | Patient Selection      | Index Test | Reference Standard |
| Yelderman 1992   | ?                 | ✗          | ✗                  | ✓               | ✓                      | ✓          | ✓                  |
| Boldt 1994       | ✓                 | ✓          | ✓                  | ✓               | ✓                      | ✓          | ✓                  |
| Hogue 1994       | ✓                 | ✓          | ✓                  | ✓               | ✓                      | ✓          | ✓                  |
| Böttiger 1995    | ✓                 | ✓          | ✓                  | ✓               | ✓                      | ✓          | ✓                  |
| Ditmyer 1995     | ✓                 | ✓          | ✓                  | ✓               | ✓                      | ✓          | ✓                  |
| Haller 1995      | ✓                 | ✓          | ✓                  | ✓               | ✓                      | ✓          | ✓                  |
| Jakobsen 1995    | ?                 | ✓          | ✓                  | ✓               | ✓                      | ✓          | ✓                  |
| Lefrant 1995     | ✓                 | ✓          | ✓                  | ✓               | ✓                      | ✓          | ✓                  |
| Böttiger 1996    | ✓                 | ✓          | ✓                  | ✓               | ✓                      | ✓          | ✓                  |
| Jacquet 1996     | ✓                 | ✓          | ✓                  | ?               | ✓                      | ✓          | ✓                  |
| Le Tulzo 1996    | ✓                 | ✓          | ✓                  | ?               | ✓                      | ✓          | ✓                  |
| Böttiger 1997    | ✓                 | ✓          | ✓                  | ✓               | ✓                      | ✓          | ✓                  |
| Boyle 1997       | ✗                 | ✗          | ✓                  | ✗               | ✓                      | ✓          | ✓                  |
| Burchell 1997    | ✗                 | ✓          | ✓                  | ✗               | ✓                      | ✓          | ✓                  |
| Greim 1997       | ✓                 | ✓          | ✓                  | ✓               | ✓                      | ✓          | ✓                  |
| Lazor 1997       | ✓                 | ✓          | ✓                  | ✓               | ✓                      | ✓          | ✓                  |
| Mihm 1998        | ✓                 | ✓          | ✓                  | ✓               | ✓                      | ✓          | ✓                  |
| Monchi 1998      | ✓                 | ✓          | ✓                  | ✓               | ✓                      | ✓          | ✓                  |
| Rödig 1998       | ✓                 | ✓          | ✓                  | ✓               | ✓                      | ✓          | ✓                  |
| Seguin 1998      | ✓                 | ✓          | ✓                  | ✓               | ✓                      | ✓          | ✓                  |
| Albert 1999      | ✓                 | ✓          | ✓                  | ✓               | ✓                      | ✓          | ✓                  |
| Cathelyn 1999    | ✓                 | ✓          | ✓                  | ?               | ✓                      | ✓          | ✓                  |
| Neto 1999        | ✓                 | ✓          | ✓                  | ✓               | ✓                      | ✓          | ✓                  |
| Rödig 1999       | ✓                 | ✓          | ✓                  | ✓               | ✓                      | ✓          | ✓                  |
| Schmid 1999      | ✓                 | ✓          | ✓                  | ✓               | ✓                      | ✓          | ✓                  |
| Zöllner 1999     | ✓                 | ✓          | ✓                  | ✓               | ✓                      | ✓          | ✓                  |
| Sakka 2000       | ✓                 | ✓          | ✓                  | ✓               | ✓                      | ✓          | ✓                  |
| Nelson 2001      | ✓                 | ✓          | ✓                  | ✓               | ✓                      | ✓          | ✓                  |
| Zöllner 2001     | ✓                 | ✓          | ✓                  | ?               | ✓                      | ✓          | ✓                  |
| Della Rocca 2002 | ✓                 | ✓          | ✓                  | ✓               | ✓                      | ✓          | ✓                  |
| Rauch 2002       | ✓                 | ✓          | ✓                  | ✓               | ✓                      | ✓          | ✓                  |
| Singh 2002       | ✓                 | ✓          | ✓                  | ✓               | ✓                      | ✓          | ✓                  |
| Della Rocca 2003 | ✗                 | ?          | ✓                  | ?               | ✓                      | ✓          | ✓                  |
| Kotake 2003      | ✓                 | ?          | ✓                  | ?               | ✓                      | ✓          | ✓                  |
| Mielck 2003      | ✓                 | ✓          | ✓                  | ✓               | ✓                      | ✓          | ✓                  |
| Padua 2003       | ✓                 | ✓          | ✓                  | ?               | ✓                      | ✓          | ✓                  |
| Thierry 2003     | ✗                 | ✓          | ✗                  | ✓               | ✓                      | ✓          | ✓                  |
| Ishihara 2004    | ✓                 | ✓          | ✓                  | ✓               | ✓                      | ✓          | ✓                  |
| Leather 2004     | ✓                 | ✓          | ✓                  | ✓               | ✓                      | ✓          | ✓                  |
| Bendjelid 2006   | ✓                 | ✓          | ✓                  | ✓               | ✓                      | ✓          | ✓                  |
| Button 2007      | ✓                 | ✓          | ✓                  | ✓               | ✓                      | ✓          | ✓                  |
| Manecke 2007     | ✓                 | ✓          | ✓                  | ✓               | ✓                      | ✓          | ✓                  |
| McGee 2007       | ✓                 | ?          | ✓                  | ✓               | ✓                      | ✓          | ✓                  |
| Bao 2008         | ✓                 | ✓          | ✓                  | ?               | ✓                      | ✓          | ✓                  |
| Costa 2008       | ✓                 | ✓          | ✓                  | ?               | ✓                      | ✓          | ✓                  |
| Kotake 2009      | ✓                 | ✓          | ✓                  | ✓               | ✓                      | ✓          | ✓                  |
| Cecconi 2010     | ✓                 | ✓          | ?                  | ✓               | ✓                      | ✓          | ✓                  |
| Hamm 2010        | ✓                 | ?          | ?                  | ?               | ✓                      | ✓          | ✓                  |
| Akiyoshi 2011    | ✓                 | ✓          | ✓                  | ✓               | ✓                      | ✓          | ✓                  |
| Cecchini 2012    | ✗                 | ✗          | ✗                  | ✗               | ✓                      | ✓          | ✓                  |
| Costa 2014       | ✓                 | ✓          | ✓                  | ✓               | ✓                      | ✓          | ✓                  |
| Peyton 2014      | ✓                 | ?          | ?                  | ✓               | ✓                      | ✓          | ✓                  |
| Cho 2016         | ✓                 | ✓          | ✓                  | ✓               | ✓                      | ✓          | ✓                  |
| Ganter 2016      | ✓                 | ✓          | ✓                  | ✓               | ✓                      | ✓          | ✓                  |
