# Supplementary material for: Agreement between continuous and intermittent pulmonary artery thermodilution for cardiac output measurement in perioperative and intensive care medicine: a systematic review and meta-analysis
Source: Springer Nature journal article supplement (doi:10.1186/s13054-021-03523-7), 2021-03-29

Additional file 6: Funnel plot for the percentage error with Eggers regression test

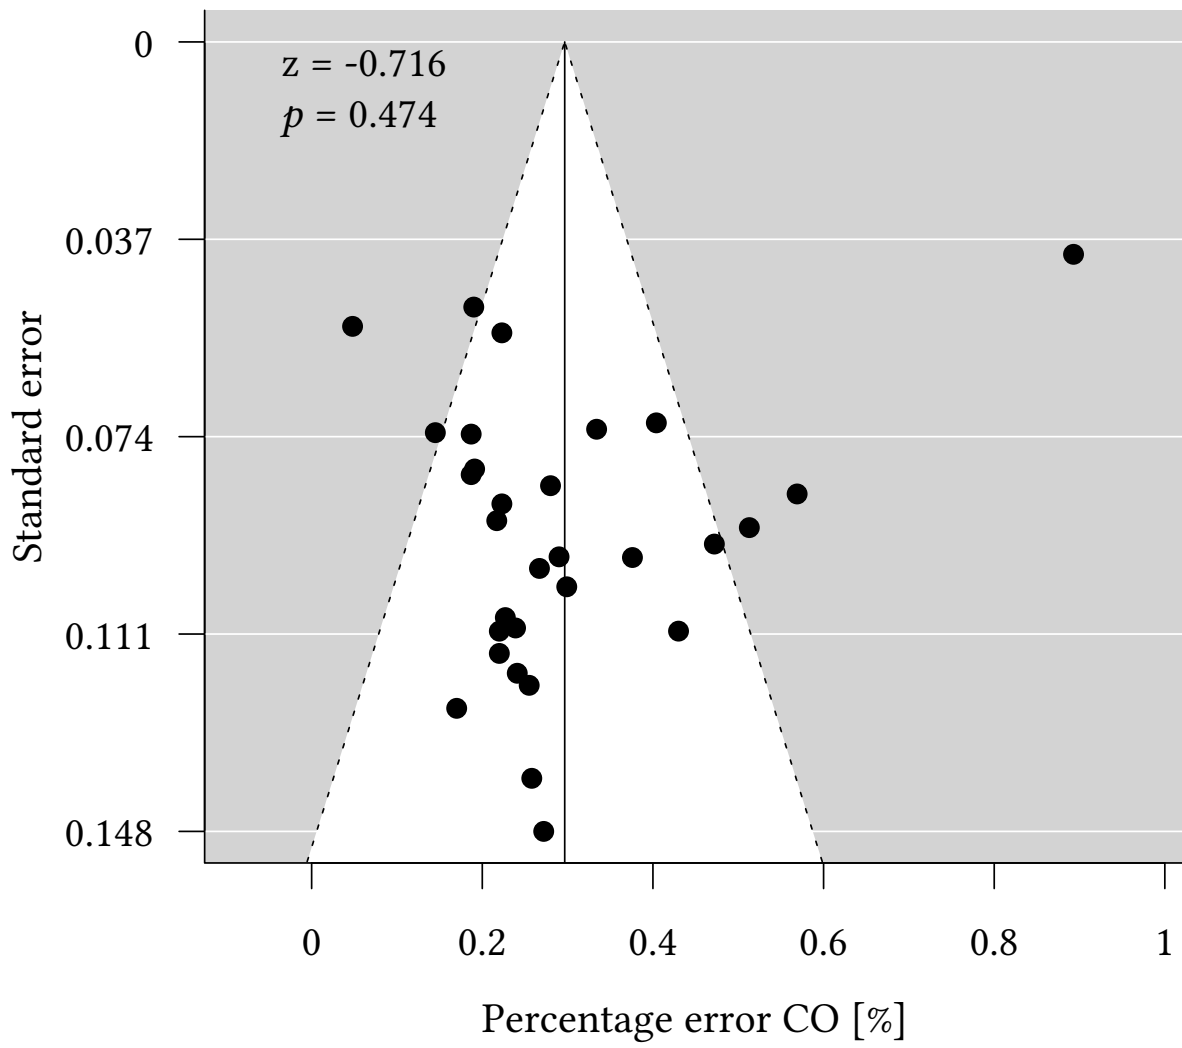

Supplement: MOESM6 [file 19016686]
