# Supplementary material for: Agreement between continuous and intermittent pulmonary artery thermodilution for cardiac output measurement in perioperative and intensive care medicine: a systematic review and meta-analysis
Source: Springer Nature journal article supplement (doi:10.1186/s13054-021-03523-7), 2021-03-29
Supplement: MOESM10 [file 19016686]

**Additional file 10: Forest plot showing subgroup analysis for patients having cardiac surgery**

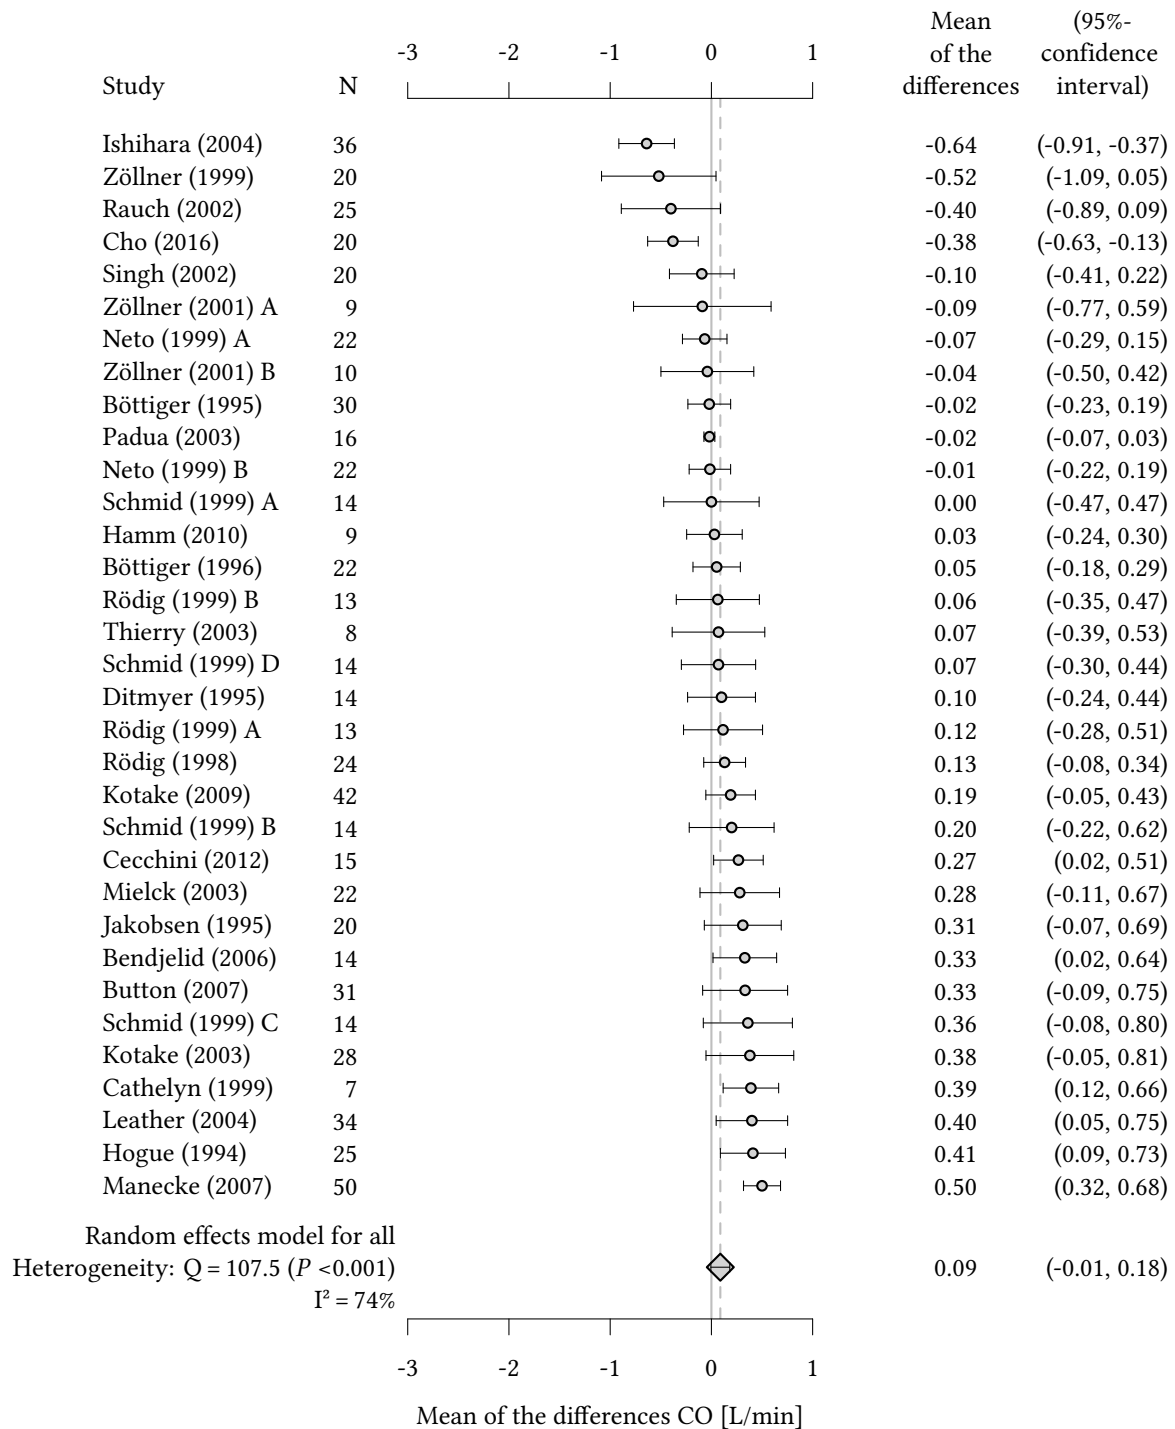

Pooled 95%-limits of agreement: -1.38 to 1.54 L/min
